# Supplementary material for: The case-crossover design for studying sudden events
Source: PubMed Central journal article supplement — BMJ Med. 2022 May 31;1(1):e000214. doi: 10.1136/bmjmed-2022-000214 (PMC9978680; doi:10.1136/bmjmed-2022-000214), 2022-05-31
Supplement: bmjmed-2022-000214.draft_revisions.pdf [file bmjmed-2022-000214.draft_revisions.pdf]

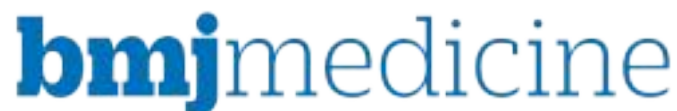

BMJ Medicine is committed to open peer review. As part of this commitment, we make the peer review history of every article we publish publicly available.

When an article is published we post the peer reviewers' comments and the authors' responses online. We also post the versions of the paper that were used during peer review. These are the versions that the peer review comments apply to.

The versions of the paper that follow are the versions that were submitted during the peer review process. They are not the versions of record or the final published versions. They should not be cited or distributed as the published version of this manuscript.

BMJ Medicine is an open access journal and the full, final, typeset and author-corrected version of record of the manuscript is available on our site with no access controls, subscription charges or pay-per-view fees (<http://bmjmedicine.bmj.com>).

If you have any questions on BMJ Medicine's open peer review process please email [info.bmjmedicine@bmj.com](mailto:info.bmjmedicine@bmj.com)

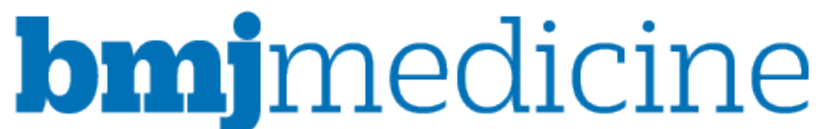

**The case-crossover design for studying sudden events:  
methods primer**

|                               |                                                                                                                                                                                                                                                                       |
|-------------------------------|-----------------------------------------------------------------------------------------------------------------------------------------------------------------------------------------------------------------------------------------------------------------------|
| Journal:                      | <i>BMJ Medicine</i>                                                                                                                                                                                                                                                   |
| Manuscript ID                 | bmjmed-2022-000214                                                                                                                                                                                                                                                    |
| Article Type:                 | Methods primer                                                                                                                                                                                                                                                        |
| Date Submitted by the Author: | 31-Mar-2022                                                                                                                                                                                                                                                           |
| Complete List of Authors:     | Lewer, Dan; University College London, Epidemiology and Public Health<br>Petersen, Irene ; UCL, Department of Primary Care and Population Health<br>Maclure, Malcolm; The University of British Columbia, Department of Anesthesiology, Pharmacology and Therapeutics |
| Keywords:                     | Epidemiology                                                                                                                                                                                                                                                          |
|                               |                                                                                                                                                                                                                                                                       |

SCHOLARONE™  
Manuscripts

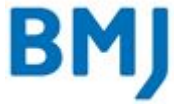

I, the Submitting Author has the right to grant and does grant on behalf of all authors of the Work (as defined in the below author licence), an exclusive licence and/or a non-exclusive licence for contributions from authors who are: i) UK Crown employees; ii) where BMJ has agreed a CC-BY licence shall apply, and/or iii) in accordance with the terms applicable for US Federal Government officers or employees acting as part of their official duties; on a worldwide, perpetual, irrevocable, royalty-free basis to BMJ Publishing Group Ltd ("BMJ") its licensees and where the relevant Journal is co-owned by BMJ to the co-owners of the Journal, to publish the Work in this journal and any other BMJ products and to exploit all rights, as set out in our [licence](#).

The Submitting Author accepts and understands that any supply made under these terms is made by BMJ to the Submitting Author unless you are acting as an employee on behalf of your employer or a postgraduate student of an affiliated institution which is paying any applicable article publishing charge ("APC") for Open Access articles. Where the Submitting Author wishes to make the Work available on an Open Access basis (and intends to pay the relevant APC), the terms of reuse of such Open Access shall be governed by a Creative Commons licence – details of these licences and which [Creative Commons](#) licence will apply to this Work are set out in our licence referred to above.

Other than as permitted in any relevant BMJ Author's Self Archiving Policies, I confirm this Work has not been accepted for publication elsewhere, is not being considered for publication elsewhere and does not duplicate material already published. I confirm all authors consent to publication of this Work and authorise the granting of this licence.

## Methods primers article template

February 2022

Sophie Cook

### The case-crossover design for studying sudden events: methods primer

Dan Lewer<sup>1</sup>  
Irene Petersen<sup>2</sup>  
Malcolm Maclure<sup>3</sup>

<sup>1</sup> Department of Epidemiology and Public Health, UCL

<sup>2</sup> Department of Primary Care and Population Health, UCL

<sup>3</sup> Department of Anesthesiology, Pharmacology and Therapeutics, University of British Columbia, Vancouver BC.

#### Correspondence to:

Dan Lewer

1-19 Torrington Place, London, WC1E 7HB

Email: [d.lewer@ucl.ac.uk](mailto:d.lewer@ucl.ac.uk)

Phone: +44 (0) 7766 395 792

Word count: 1174

References: 12

#### Box 1: Key messages

- Case-crossover studies focus on the triggers of sudden events such as heart attacks, car crashes, adverse medication reactions, and drug overdoses
- Comparisons are made within individuals by comparing exposures just before an event to exposures at another 'control' time, eliminating many confounding problems that affect traditional epidemiological studies
- Researchers need to consider time-varying confounding, and make decisions about the timing of 'control' windows
- Databases and technologies that record health exposures over time will allow many new applications of the case-crossover study

#### Conflicts of Interest

We have read and understood [BMJ policy on declaration of interests](#) and have no interests to declare.

#### Licence

This is an open access article distributed in accordance with the Creative Commons Attribution Non Commercial (CC BY-NC 4.0) license, which permits others to distribute, remix, adapt, build upon this work non-commercially, and license their derivative works on different terms, provided the original work is properly cited, appropriate credit is given, any changes made indicated, and the use is non-commercial. See: <http://creativecommons.org/licenses/by-nc/4.0/>.

## The case-crossover design for studying sudden events: methods primer

### Standfirst

*Case-crossover studies measure the triggering effect of transient exposures on sudden events. This article outlines key design features, applications, and limitations.*

### Introduction

The case-crossover method is an epidemiological design for studying potential causes of sudden events,[1] such as whether vigorous exertion or drinking alcohol triggers a myocardial infarction (MI).[2] Case-crossover studies are one of a family of 'self-controlled' study designs,[3] including cross-over experiments and the self-controlled case series[4] (Box 2). Each subject serves as their own control. These designs address the question 'why now?', by studying whether exposure times are associated with outcome times within individuals. In contrast, standard observational studies make comparisons between individuals, such differences in MI rates between alcohol drinkers and non-drinkers (a cohort study) or whether sedentary lifestyles are more common among MI cases than other people who have not had an MI (a case-control study).

A case-crossover study only includes individuals who experience an event ('cases'). Figure 1 is an illustrative study looking the association between vigorous exertion and MI. In the case-crossover approach, non-cases are excluded. The probability of exertion shortly before MI is compared to the probability 24hr before in the same individuals. In contrast to the case-crossover approach, a case-control study might match cases who had an MI with controls who had not had an MI by that point in time, and compare the probability of recent exercise.

*Figure 1: Illustrative case-crossover study of the association between vigorous exertion and myocardial infarction*

*Figure 1 caption: The relation between case-crossover and case-control designs is illustrated with timelines for six individuals (A to F) in a case-control study (left). A, B and C had myocardial infarctions (encircled X). D, E and F were controls selected at the same times (open circles). The exposure of interest was vigorous exertion (rectangles). A case-crossover design (right) compares the probability of exertion in the hour before MI to the same time the previous day in the same individual. Non-cases (D to F) do not contribute to the case-crossover analysis.*

#### Box 2: Comparison of features of the case-crossover and self-controlled case series designs

|                            | Case-crossover                    | Self-controlled case series            |
|----------------------------|-----------------------------------|----------------------------------------|
| Analogous to               | Case-control study                | Cohort study                           |
| Developed to study         | Multiple causes of an outcome     | Multiple effects of an exposure        |
| Example                    | Triggers of myocardial infarction | Adverse effects of vaccines            |
| Anchor point (time zero)   | Onset of the outcome              | Exposure time, birth, or calendar date |
| Timing of referent windows | Usually before the outcome        | Before and after the exposure period   |
| Potential bias             | Exposure trend or persistence     | Reverse causality                      |
| Comparisons                | Ratios of odds of exposure        | Ratios or differences in outcomes      |
| Statistical model          | Conditional logistic regression   | Poisson conditioned on person and time |
| Model assumes              | Outcome fixed, random exposure    | Exposure fixed, random outcome         |

### Example applications

The case-crossover design was developed for an interview study of triggers of MI such as exertion, alcohol, anger, and cannabis.[1] It has since been used with databases in many contexts,[8] and here we give four brief examples.

1  
2  
3 (i) Air pollution and cardiovascular events. Case-crossover studies have found elevated concentrations of pollutants on  
4 the day of a stroke or heart attack compared to the concentration on earlier or later days.[5] These studies are often  
5 statistically powerful because researchers can include large numbers of cases and determine pollution from routine  
6 weather records. (ii) Car crashes and mobile phone use. Case-crossover studies have found that drivers have several  
7 times the odds of using a mobile phone in the minutes before the crash when compared to similar a time-of-day earlier  
8 in the week.[6,7] (iii) Adverse medication effects. A study of falls among hospital inpatients found that new prescriptions  
9 of various drugs such as antihypertensives and hypnotics were more common in the three days before the fall than  
10 during earlier referent windows.[8] (iv) Triggers of drug overdoses. A study of deaths in England found that decedents  
11 were four times more likely to have been recently discharged after inpatient medical treatment compared with the two  
12 years before death.[9] Common features of these research questions include the focus on sudden events and the  
13 'triggering' effect of transient exposures.  
14  
15  
16

### 17 **Selection of control (or 'referent') windows**

18  
19  
20 The choice of referent windows is a key design decision. It is dependent on the definition of 'at-risk' time, or the 'study  
21 base'.<sup>[2]</sup> In the study of car crashes in Australia,<sup>[7]</sup> the researchers compared mobile phone use at the time of the crash  
22 to earlier car trips at similar times-of-day; not just the same time on previous days when the participant might not have  
23 been driving.  
24

25  
26 Researchers must consider the duration of effect, or 'effect period'<sup>[3]</sup>: the period after exposure when we hypothesise  
27 that the event might be triggered. This may not be known precisely and may vary between individuals. When attempting  
28 to set referent windows that match effect periods, researchers often need to make informed judgements and simplifying  
29 assumptions. Referent windows that are too short will reduce power by excluding relevant events, while windows that  
30 are too long will dilute the estimated effect.  
31

32  
33 The time between the event and referent window is also important. The referent windows should be sufficiently distant  
34 from the event so that exposure is not affected by the event. Simultaneously, referent windows should be sufficiently  
35 recent that the underlying rate of exposure is comparable, or 'exchangeable'.<sup>[10]</sup> In a study of mobile phone use and  
36 car crashes, the probability of mobile phone use during a referent window five minutes before the crash would be  
37 correlated with mobile phone use at the time of the crash because some phone calls are longer than this. A control  
38 window one year before the crash might be inappropriate if it was during a COVID-19 lockdown.  
39

40  
41 Referent windows can be before the event, after the event, or both. In the example in Figure 1, MI is likely to reduce  
42 vigorous exercise, at least temporarily, so we would only select historical referent windows. Referent windows after a  
43 non-fatal MI would overstate the risks of exercise ('reverse causality bias' in Box 2). If the event does not affect  
44 subsequent exposure, such as in studies of air pollution, then referent windows both before and after the event reduces  
45 the risk of bias due to time trends in the exposure.  
46

### 47 **Strengths and limitations**

48  
49  
50 In common with other self-controlled designs, a strength of the case-crossover design is that it eliminates time-invariant  
51 confounders, even when unmeasured. This includes personality traits, genetics, country of birth, and many other  
52 constant characteristics of patients not recorded in medical charts. For example, in Figure 1, the underlying severity of  
53 atherosclerosis is constant over the two days of observation.  
54

55  
56 Another reason for using the case-crossover design is if suitable controls are difficult to find in case-control studies. For  
57 example, in the study of hospital discharges and opioid overdoses,<sup>[9]</sup> a traditional case-control study would be  
58 challenging because it would need to recruit a representative sample of controls who were at-risk of opioid overdose at  
59 the time the cases died.  
60

1  
2  
3 Three key limitations of the case-crossover design are time-varying confounding, the limitation to the short-term effects  
4 of transient exposures, and selection biases.  
5

6 Co-occurring acute exposures are especially challenging in case-crossover design. For example, if we want to study  
7 the effect of cannabis use on injury, the association might be confounded by co-occurring alcohol consumption (Figure  
8 2). As in any observational study, the causal relationship between exposures and potential confounders must be  
9 interpreted by the researcher based on existing evidence and common sense. Where time-varying confounders are  
10 measured, they can be controlled in multivariable analysis as in traditional epidemiological studies.  
11  
12

13 *Figure 2: Example of time-varying confounding in a case-crossover study of injuries: co-occurrence of cannabis and*  
14 *alcohol consumption would result in the association between cannabis use and injury being confounded by alcohol use.*  
15

16 Case-crossover only capture the short-term effects of transient exposures, such as an adverse event soon after starting  
17 a medication. However, cumulative harms or benefits from long-term medication would not be picked up by a case-  
18 crossover study. Transient effects can be in the opposite direction of cumulative effects: while a single run increases  
19 your immediate risk of MI, regular running reduces your risk. Transient and cumulative effects can be disentangled by  
20 combining a case-crossover design with a case-control study as in Figure 1. This also helps understand different forms  
21 of bias and contribute to 'triangulation' of causal associations.[11]  
22  
23

24 Case-crossover studies use information from cases only if their exposure status varies over time. These individuals may  
25 be unrepresentative of the whole population. In example in Figure 1, people who exercise at the same time each day,  
26 potentially an important part of the population, are excluded because their exposure status will be the same at the time  
27 of the MI and 24 hours earlier. Multiple referent windows may increase the number of cases who have varying exposure  
28 status.  
29  
30

### 31 **Conclusion**

32  
33 The case-crossover design is a widely used tool for studying triggers of sudden health events. As databases following  
34 individuals over time increase in number and richness, many new opportunities to use this design will be found.[12]  
35  
36  
37  
38  
39

### 40 **Competing interests**

41  
42 Competing interests: We have read and understood the BMJ policy on declaration of interest and declare the following  
43 interests: none.  
44  
45

### 46 **References**

- 47 1 Maclure M. The Case-Crossover Design: A Method for Studying Transient Effects on the Risk of Acute Events.  
48 Am J Epidemiol 1991;133:144–53. doi:10.1093/oxfordjournals.aje.a115853
- 49 2 Maclure M, Mittleman MA. Should We Use a Case-Crossover Design? Annu Rev Public Health 2000;21:193–  
50 221. doi:10.1146/annurev.publhealth.21.1.193
- 51 3 Cadarette SM, Maclure M, Delaney JAC, et al. Control yourself: ISPE-ENDORSED guidance in the application of  
52 SELF-CONTROLLED study designs in pharmacoepidemiology. Pharmacoepidemiol Drug Saf 2021;30:671–84.  
53 doi:10.1002/pds.5227
- 54 4 Petersen I, Douglas I, Whitaker H. Self controlled case series methods: an alternative to standard epidemiological  
55 study designs. BMJ 2016;:i4515. doi:10.1136/bmj.i4515
- 56 5 Stieb DM, Zheng C, Salama D, et al. Systematic review and meta-analysis of case-crossover and time-series  
57 studies of short term outdoor nitrogen dioxide exposure and ischemic heart disease morbidity. Environ Health  
58 2020;19:47. doi:10.1186/s12940-020-00601-1  
59  
60

- 1  
2  
3 6 Redelmeier DA, Tibshirani RJ. Association between Cellular-Telephone Calls and Motor Vehicle Collisions. *N Engl J Med* 1997;336:453–8. doi:10.1056/NEJM199702133360701
- 4  
5 7 McEvoy SP, Stevenson MR, McCartt AT, et al. Role of mobile phones in motor vehicle crashes resulting in  
6 hospital attendance: a case-crossover study. *BMJ* 2005;331:428. doi:10.1136/bmj.38537.397512.55
- 7  
8 8 Shuto H, Imakyure O, Matsumoto J, et al. Medication use as a risk factor for inpatient falls in an acute care  
9 hospital: a case-crossover study: Case-crossover study on medication use and fall events. *Br J Clin Pharmacol*  
10 2010;69:535–42. doi:10.1111/j.1365-2125.2010.03613.x
- 11 9 Lewer D, Eastwood B, White M, et al. Fatal opioid overdoses during and shortly after hospital admissions in  
12 England: A case-crossover study. *PLOS Med* 2021;18:e1003759. doi:10.1371/journal.pmed.1003759
- 13 10 Mittleman MA, Mostofsky E. Exchangeability in the case-crossover design. *Int J Epidemiol* 2014;43:1645–55.  
14 doi:10.1093/ije/dyu081
- 15 11 Lawlor DA, Tilling K, Davey Smith G. Triangulation in aetiological epidemiology. *Int J Epidemiol* 2017;:dyw314.  
16 doi:10.1093/ije/dyw314
- 17 12 Dixon WG, Beukenhorst AL, Yimer BB, et al. How the weather affects the pain of citizen scientists using a  
18 smartphone app. *Npj Digit Med* 2019;2:105. doi:10.1038/s41746-019-0180-3
- 19  
20  
21  
22  
23  
24  
25  
26  
27  
28  
29  
30  
31  
32  
33  
34  
35  
36  
37  
38  
39  
40  
41  
42  
43  
44  
45  
46  
47  
48  
49  
50  
51  
52  
53  
54  
55  
56  
57  
58  
59  
60



1  
2  
3  
4  
5  
6  
7  
8  
9  
10  
11  
12  
13  
14  
15  
16  
17  
18  
19  
20  
21  
22  
23  
24  
25  
26  
27  
28  
29  
30  
31  
32  
33  
34  
35  
36  
37  
38  
39  
40  
41  
42  
43  
44  
45  
46  
47  
48  
49  
50  
51  
52  
53  
54  
55  
56  
57  
58  
59  
60

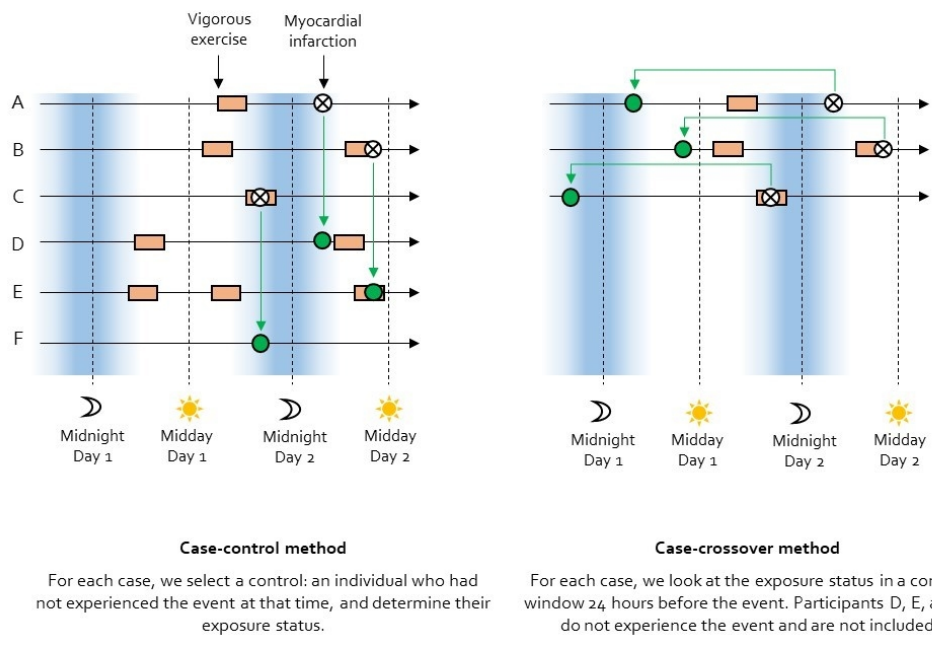

Figure 1: Illustrative case-crossover study of the association between vigorous exertion and myocardial infarction

208x134mm (120 x 120 DPI)

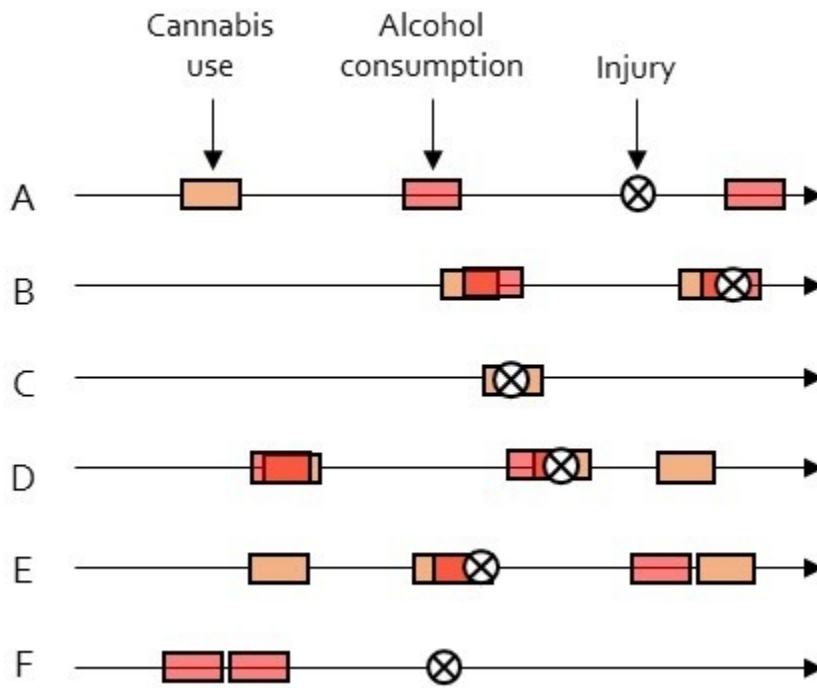

Figure 2: Example of time-varying confounding in a case-crossover study of injuries: co-occurrence of cannabis and alcohol consumption would result in the association between cannabis use and injury being confounded by alcohol use.

92x75mm (120 x 120 DPI)

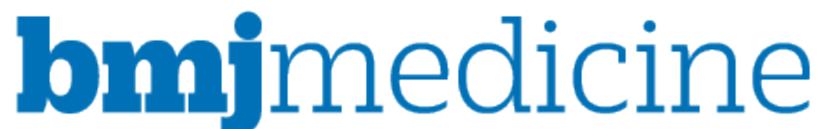

**The case-crossover design for studying sudden events:  
methods primer**

|                               |                                                                                                                                                                                                                                                                       |
|-------------------------------|-----------------------------------------------------------------------------------------------------------------------------------------------------------------------------------------------------------------------------------------------------------------------|
| Journal:                      | <i>BMJ Medicine</i>                                                                                                                                                                                                                                                   |
| Manuscript ID                 | bmjmed-2022-000214.R1                                                                                                                                                                                                                                                 |
| Article Type:                 | Methods primer                                                                                                                                                                                                                                                        |
| Date Submitted by the Author: | 03-May-2022                                                                                                                                                                                                                                                           |
| Complete List of Authors:     | Lewer, Dan; University College London, Epidemiology and Public Health<br>Petersen, Irene ; UCL, Department of Primary Care and Population Health<br>Maclure, Malcolm; The University of British Columbia, Department of Anesthesiology, Pharmacology and Therapeutics |
| Keywords:                     | Epidemiology                                                                                                                                                                                                                                                          |
|                               |                                                                                                                                                                                                                                                                       |

SCHOLARONE™  
Manuscripts

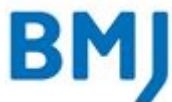

I, the Submitting Author has the right to grant and does grant on behalf of all authors of the Work (as defined in the below author licence), an exclusive licence and/or a non-exclusive licence for contributions from authors who are: i) UK Crown employees; ii) where BMJ has agreed a CC-BY licence shall apply, and/or iii) in accordance with the terms applicable for US Federal Government officers or employees acting as part of their official duties; on a worldwide, perpetual, irrevocable, royalty-free basis to BMJ Publishing Group Ltd ("BMJ") its licensees and where the relevant Journal is co-owned by BMJ to the co-owners of the Journal, to publish the Work in this journal and any other BMJ products and to exploit all rights, as set out in our [licence](#).

The Submitting Author accepts and understands that any supply made under these terms is made by BMJ to the Submitting Author unless you are acting as an employee on behalf of your employer or a postgraduate student of an affiliated institution which is paying any applicable article publishing charge ("APC") for Open Access articles. Where the Submitting Author wishes to make the Work available on an Open Access basis (and intends to pay the relevant APC), the terms of reuse of such Open Access shall be governed by a Creative Commons licence – details of these licences and which [Creative Commons](#) licence will apply to this Work are set out in our licence referred to above.

Other than as permitted in any relevant BMJ Author's Self Archiving Policies, I confirm this Work has not been accepted for publication elsewhere, is not being considered for publication elsewhere and does not duplicate material already published. I confirm all authors consent to publication of this Work and authorise the granting of this licence.

## Methods primers article template

February 2022

Sophie Cook

### The case-crossover design for studying sudden events: methods primer

Dan Lewer<sup>1</sup>  
Irene Petersen<sup>2</sup>  
Malcolm Maclure<sup>3</sup>

<sup>1</sup> Department of Epidemiology and Public Health, UCL, London, UK

<sup>2</sup> Department of Primary Care and Population Health, UCL, London, UK

<sup>3</sup> Department of Anesthesiology, Pharmacology and Therapeutics, University of British Columbia, Vancouver BC, Canada

#### Correspondence to:

Dan Lewer  
1-19 Torrington Place, London, WC1E 7HB  
Email: [d.lewer@ucl.ac.uk](mailto:d.lewer@ucl.ac.uk)  
Phone: +44 (0) 7766 395 792

Word count: 1411

References: 14

#### Box 1: Key messages

- Case-crossover studies focus on the triggers of sudden events such as heart attacks, car crashes, adverse medication reactions, and drug overdoses
- Comparisons are made within individuals by comparing exposures just before an event to exposures at another 'control' time, eliminating many confounding problems that affect traditional epidemiological studies
- Researchers need to consider time-varying confounding, and make decisions about the timing of 'control' windows
- Databases and technologies that record health exposures over time will allow many new applications of the case-crossover study

#### Conflicts of Interest

We have read and understood [BMJ policy on declaration of interests](#) and have no interests to declare.

#### Licence

This is an open access article distributed in accordance with the Creative Commons Attribution Non Commercial (CC BY-NC 4.0) license, which permits others to distribute, remix, adapt, build upon this work non-commercially, and license their derivative works on different terms, provided the original work is properly cited, appropriate credit is given, any changes made indicated, and the use is non-commercial. See: <http://creativecommons.org/licenses/by-nc/4.0/>.

## The case-crossover design for studying sudden events: methods primer

### Standfirst

*Case-crossover studies measure the triggering effect of transient exposures on sudden events. This article outlines key design features, applications, and limitations.*

### Introduction

The case-crossover method is an epidemiological design for studying potential causes of sudden events,[1] such as whether vigorous exertion or drinking alcohol triggers a myocardial infarction (MI).[2] Case-crossover studies are one of a family of 'self-controlled' study designs,[3] including cross-over experiments and the self-controlled case series[4] (Box 2). Each subject serves as their own control, and the analysis tests whether exposure times are associated with outcome times within individuals. In contrast, standard observational studies make comparisons between individuals, such as differences in MI rates between alcohol drinkers and non-drinkers (a cohort study) or whether sedentary lifestyles are more common among MI cases than people who have not previously had an MI (a case-control study).

A case-crossover study only includes individuals who experience an event ('cases'). Figure 1 is an illustrative study looking at the association between vigorous exertion and MI. In the case-crossover approach, non-cases are excluded. In this example, the probability of exertion in the time window before MI is compared to the probability in that window 24hr earlier in the same individuals. If someone had an MI at 6pm on Friday and we are interested in the risk up to one hour after physical exertion, we would take their history of exertion between 5pm and 6pm on that day, and compare it to their physical exertion between 5pm and 6pm on Thursday. If the participant died this information may be ascertained by interviewing family members or other informants. In contrast to the case-crossover approach, a case-control study might match cases who had an MI with controls who had not had an MI by that point in time, and compare the probability of recent exercise.

*Figure 1: Illustrative case-crossover study of the association between vigorous exertion and myocardial infarction*

*Figure 1 caption: The relation between case-crossover and case-control designs is illustrated with timelines for six individuals (A to F) in a case-control study (left). A, B, and C had myocardial infarctions (encircled X). D, E, and F are controls selected at the same times (green circles). The exposure of interest was vigorous exertion (rectangles). A case-crossover design (right) compares the probability of exertion in the hour before MI to the same time the previous day in the same individual. Non-cases (D, E, and F) do not contribute to the case-crossover analysis.*

#### Box 2: Comparison of features of the case-crossover and self-controlled case series designs

|                                   | Case-crossover                                         | Self-controlled case series                                                   |
|-----------------------------------|--------------------------------------------------------|-------------------------------------------------------------------------------|
| <b>Analogous to</b>               | Case-control study                                     | Cohort study                                                                  |
| <b>Developed to study</b>         | Multiple causes of an outcome                          | Multiple effects of an exposure                                               |
| <b>Example</b>                    | Triggers of myocardial infarction                      | Adverse effects of vaccines                                                   |
| <b>Anchor point (time zero)</b>   | Onset of the outcome                                   | Exposure time, birth, or calendar date                                        |
| <b>Timing of referent windows</b> | Usually before the outcome                             | Before and after the outcome                                                  |
| <b>Potential bias</b>             | Exposure trend or persistence                          | Reverse causality                                                             |
| <b>Comparisons</b>                | Ratios of odds of exposure                             | Ratios in risk of outcomes                                                    |
| <b>Statistical model</b>          | Conditional logistic or conditional Poisson regression | Conditional logistic or conditional Poisson regression, offset by person-time |

## Example applications

The case-crossover design was developed for an interview study of triggers of MI such as exertion, alcohol, anger, and cannabis.[1] It has since been used with databases in many contexts,[8] and here we give four brief examples.

(i) Air pollution and cardiovascular events. Case-crossover studies have found elevated concentrations of pollutants on the day of a stroke or heart attack compared to the concentration on earlier or later days.[5] These studies are often statistically powerful because researchers can include large numbers of cases and determine pollution from routine weather records. (ii) Car crashes and mobile phone use. Case-crossover studies have found that drivers have several times the odds of using a mobile phone in the minutes before the crash when compared to similar a time-of-day earlier in the week.[6,7] (iii) Adverse medication effects. A study of falls among hospital inpatients found that new prescriptions of drugs such as antihypertensives and hypnotics were more common in the three days before the fall than during earlier referent windows.[8] (iv) Triggers of drug overdoses. A study of deaths in England found that decedents were four times more likely to have been recently discharged after inpatient medical treatment compared with the two years before death.[9] Common features of these research questions include the focus on sudden events and the 'triggering' effect of transient exposures.

## Selection of control (or 'referent') windows

The duration and timing of referent windows is a key design decision. It is dependent on the definition of 'at-risk' time, or the 'study base'. [2] In a study of car crashes in Australia,[7] the researchers compared mobile phone use at the time of the crash to earlier car trips at similar times-of-day; not just the same time on previous days when the participant might not have been driving.

Researchers must consider the duration of effect, or 'effect period'[3]: the plausible duration of induction times between the trigger (e.g. physical exertion) and its outcome (e.g. MI). This may not be known precisely and may vary between individuals. When attempting to set referent windows that match effect periods, researchers often need to make informed judgements based on previous research and simplifying assumptions. These decisions are likely to affect the results. Referent windows that are too short will reduce power by excluding events, while windows that are too long are likely to bias results towards the null.

The time between the event and referent window is also important. The referent windows should be sufficiently distant from the event so that exposure is not affected by the event. Simultaneously, referent windows should be sufficiently recent that the underlying rate of exposure is comparable, or 'exchangeable'. [10] In a study of mobile phone use and car crashes, the probability of mobile phone use during a referent window five minutes before the crash would be correlated with mobile phone use at the time of the crash because some phone calls are longer than this. A control window one year before the crash might be inappropriate if it was during a COVID-19 lockdown.

Referent windows can be before the event, after the event, or both. In the example in Figure 1, MI is likely to reduce vigorous exercise, at least temporarily, so we would only select historical referent windows. Referent windows after a non-fatal MI would overstate the risks of exercise ('reverse causality bias' in Box 2). If the event does not affect subsequent exposure, such as in studies of air pollution, then referent windows both before and after the event reduces the risk of bias due to time trends in the exposure.

## Strengths and limitations

1  
2  
3 In common with other self-controlled designs, a strength of the case-crossover design is that it eliminates time-invariant  
4 confounders, even when unmeasured. This includes personality traits, genetics, country of birth, and many other  
5 constant characteristics of patients not recorded in medical charts. For example, in Figure 1, the underlying severity of  
6 atherosclerosis is constant over the two days of observation.  
7

8  
9 Another reason for using the case-crossover design is that suitable controls can be difficult to find in case-control  
10 studies. In the study of hospital discharges and opioid overdoses,[9] a traditional case-control study would be  
11 challenging because it would need to recruit a representative sample of controls who were at-risk of opioid overdose at  
12 the time the cases died.  
13

14  
15 Case-crossover designs are often statistically powerful (i.e. they produce precise estimates) because they allow  
16 sampling of a large proportion of cases. Traditional cohort or case-control studies may include more person-time, but  
17 capture fewer events and yield less precise estimates. Power calculations for case-crossover studies must account for  
18 the within-individual comparisons and the likelihood of correlated exposures. This may be done through simulation or  
19 formulas designed to account for these factors.[11]  
20

21  
22 Three key limitations of the case-crossover design are time-varying confounding, the limitation to the short-term effects  
23 of transient exposures, and selection biases.  
24

25  
26 Co-occurring acute exposures are especially challenging in case-crossover design. For example, if we want to study  
27 the effect of cannabis use on injury, the association might be confounded by co-occurring alcohol consumption (Figure  
28 2). As in any observational study, the causal relationship between exposures and potential confounders must be  
29 interpreted by the researcher based on existing evidence and common sense. Where time-varying confounders are  
30 measured, they can be controlled in multivariable analysis as in traditional epidemiological studies.  
31

32  
33 *Figure 2: Example of time-varying confounding in a case-crossover study of injuries: co-occurrence of cannabis and*  
34 *alcohol consumption would result in the association between cannabis use and injury being confounded by alcohol use.*

35  
36 Case-crossover studies only capture the short-term effects of transient exposures, such as an adverse event soon after  
37 starting a medication. However, cumulative harms or benefits from long-term medication would not be picked up by a  
38 case-crossover study. Transient effects can be in the opposite direction of cumulative effects: while a single run  
39 increases your immediate risk of MI, regular running reduces your risk. Transient and cumulative effects can be  
40 disentangled by combining a case-crossover design with a case-control study as in Figure 1. This also helps understand  
41 different forms of bias and contribute to 'triangulation' of causal associations.[12]  
42

43  
44 Case-crossover studies use information from cases only if their exposure status varies over time. These individuals may  
45 be unrepresentative of the whole population. In the example in Figure 1, people who exercise at the same time each  
46 day, potentially an important part of the population, are excluded because their exposure status will be the same at the  
47 time of the MI and 24 hours earlier. Multiple referent windows may increase the number of cases who have varying  
48 exposure status.  
49

## 50 **Conclusion**

51  
52 The case-crossover design is a widely used tool for studying triggers of sudden health events. The fundamental points  
53 of the design have not changed since it was developed in the 1990s, and the original articles describing it remain a  
54 good starting point for researchers.[1,2] New opportunities to apply the method are arising with the availability of  
55 databases with time-stamped exposures, such as precise locations, mobile phone use, and retail purchases.[13,14]  
56  
57

## 58 **Competing interests**

59  
60



Competing interests: We have read and understood the BMJ policy on declaration of interest and declare the following interests: none.

### Funding

DL is funded by the National Institute for Health Research (NIHR; Doctoral Research Fellowship DRF-2018-11-ST2-016).

### Contributorship statement

DL, IP, and MM wrote the article together.

### References

- 1 Maclure M. The Case-Crossover Design: A Method for Studying Transient Effects on the Risk of Acute Events. *American Journal of Epidemiology* 1991;**133**:144–53. doi:10.1093/oxfordjournals.aje.a115853
- 2 Maclure M, Mittleman MA. Should We Use a Case-Crossover Design? *Annual Review of Public Health* 2000;**21**:193–221. doi:10.1146/annurev.publhealth.21.1.193
- 3 Cadarette SM, Maclure M, Delaney JAC, *et al*. Control yourself: ISPE-ENDORSED guidance in the application of SELF-CONTROLLED study designs in pharmacoepidemiology. *Pharmacoepidemiol Drug Saf* 2021;**30**:671–84. doi:10.1002/pds.5227
- 4 Petersen I, Douglas I, Whitaker H. Self controlled case series methods: an alternative to standard epidemiological study designs. *BMJ* 2016;**i4515**. doi:10.1136/bmj.i4515
- 5 Stieb DM, Zheng C, Salama D, *et al*. Systematic review and meta-analysis of case-crossover and time-series studies of short term outdoor nitrogen dioxide exposure and ischemic heart disease morbidity. *Environ Health* 2020;**19**:47. doi:10.1186/s12940-020-00601-1
- 6 Redelmeier DA, Tibshirani RJ. Association between Cellular-Telephone Calls and Motor Vehicle Collisions. *N Engl J Med* 1997;**336**:453–8. doi:10.1056/NEJM199702133360701
- 7 McEvoy SP, Stevenson MR, McCart AT, *et al*. Role of mobile phones in motor vehicle crashes resulting in hospital attendance: a case-crossover study. *BMJ* 2005;**331**:428. doi:10.1136/bmj.38537.397512.55
- 8 Shuto H, Imakyure O, Matsumoto J, *et al*. Medication use as a risk factor for inpatient falls in an acute care hospital: a case-crossover study: Case-crossover study on medication use and fall events. *British Journal of Clinical Pharmacology* 2010;**69**:535–42. doi:10.1111/j.1365-2125.2010.03613.x
- 9 Lewer D, Eastwood B, White M, *et al*. Fatal opioid overdoses during and shortly after hospital admissions in England: A case-crossover study. *PLoS Med* 2021;**18**:e1003759. doi:10.1371/journal.pmed.1003759
- 10 Mittleman MA, Mostofsky E. Exchangeability in the case-crossover design. *International Journal of Epidemiology* 2014;**43**:1645–55. doi:10.1093/ije/dyu081
- 11 Dharmarajan S, Lee J, Izem R. Sample size estimation for case-crossover studies. *Statistics in Medicine* 2019;**38**:956–68. doi:10.1002/sim.8030
- 12 Lawlor DA, Tilling K, Davey Smith G. Triangulation in aetiological epidemiology. *Int J Epidemiol* 2017;**dyw314**. doi:10.1093/ije/dyw314
- 13 Dixon WG, Beukenhorst AL, Yimer BB, *et al*. How the weather affects the pain of citizen scientists using a smartphone app. *npj Digit Med* 2019;**2**:105. doi:10.1038/s41746-019-0180-3
- 14 Eum Y, Yoo E-H. Using GPS-enabled mobile phones to evaluate the associations between human mobility changes and the onset of influenza illness. *Spatial and Spatio-temporal Epidemiology* 2022;**40**:100458. doi:10.1016/j.sste.2021.100458

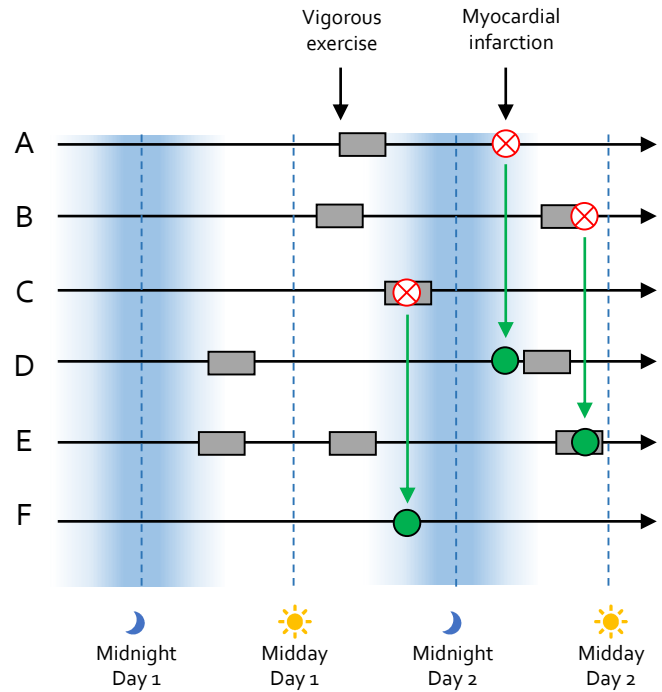

**Case-control method**

For each case, we select a control: an individual who had not experienced the event at that time, and determine their exposure status.

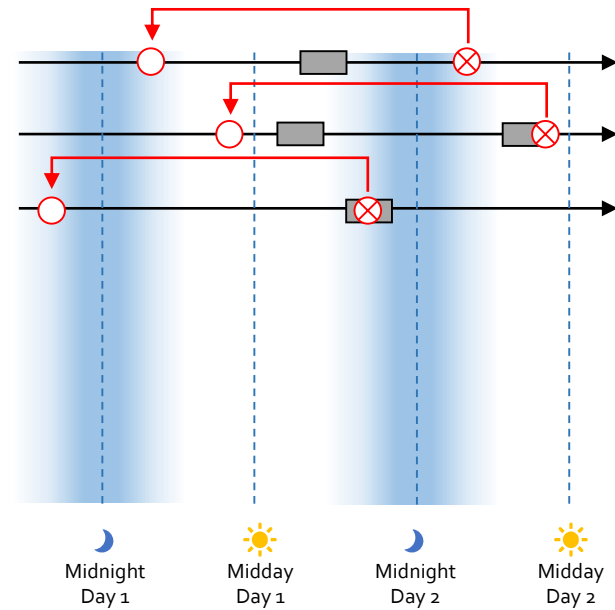

**Case-crossover method**

For each case, we look at the exposure status in a control window 24 hours before the event. Participants D, E, and F do not experience the event and are not included

1  
2  
3  
4  
5  
6  
7  
8  
9  
10  
11  
12  
13  
14  
15  
16  
17  
18  
19  
20  
21  
22  
23  
24  
25  
26  
27  
28  
29  
30  
31  
32  
33  
34  
35  
36  
37  
38  
39  
40  
41

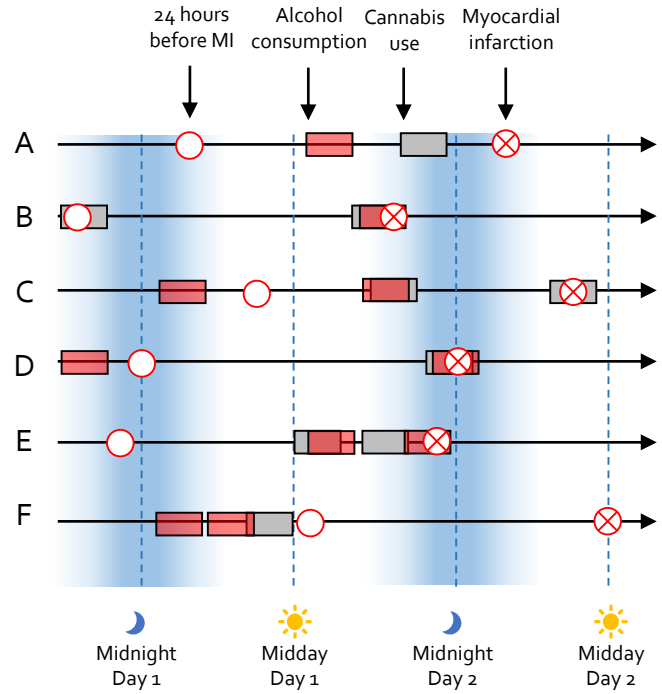

## Methods primers article template

February 2022

Sophie Cook

### The case-crossover design for studying sudden events: methods primer

Dan Lewer<sup>1</sup>  
Irene Petersen<sup>2</sup>  
Malcolm Maclure<sup>3</sup>

<sup>1</sup> Department of Epidemiology and Public Health, UCL, [London, UK](#)

<sup>2</sup> Department of Primary Care and Population Health, UCL, [London, UK](#)

<sup>3</sup> Department of Anesthesiology, Pharmacology and Therapeutics, University of British Columbia, Vancouver BC, [Canada](#)

#### Correspondence to:

Dan Lewer  
1-19 Torrington Place, London, WC1E 7HB  
Email: [d.lewer@ucl.ac.uk](mailto:d.lewer@ucl.ac.uk)  
Phone: +44 (0) 7766 395 792

Word count: [11741411](#)

References: [1214](#)

#### Box 1: Key messages

- Case-crossover studies focus on the triggers of sudden events such as heart attacks, car crashes, adverse medication reactions, and drug overdoses
- Comparisons are made within individuals by comparing exposures just before an event to exposures at another 'control' time, eliminating many confounding problems that affect traditional epidemiological studies
- Researchers need to consider time-varying confounding, and make decisions about the timing of 'control' windows
- Databases and technologies that record health exposures over time will allow many new applications of the case-crossover study

#### Conflicts of Interest

We have read and understood [BMJ policy on declaration of interests](#) and have no interests to declare.

#### Licence

This is an open access article distributed in accordance with the Creative Commons Attribution Non Commercial (CC BY-NC 4.0) license, which permits others to distribute, remix, adapt, build upon this work non-commercially, and license their derivative works on different terms, provided the original work is properly cited, appropriate credit is given, any changes made indicated, and the use is non-commercial. See: <http://creativecommons.org/licenses/by-nc/4.0/>.

## The case-crossover design for studying sudden events: methods primer

### Standfirst

Case-crossover studies measure the triggering effect of transient exposures on sudden events. This article outlines key design features, applications, and limitations.

### Introduction

The case-crossover method is an epidemiological design for studying potential causes of sudden events,[1] such as whether vigorous exertion or drinking alcohol triggers a myocardial infarction (MI).[2] Case-crossover studies are one of a family of 'self-controlled' study designs,[3] including cross-over experiments and the self-controlled case series[4] (Box 2). Each subject serves as their own control. These designs address the question 'why now?', by studying whether exposure times are associated with outcome times within individuals. In contrast, standard observational studies make comparisons between individuals, such differences in MI rates between alcohol drinkers and non-drinkers (a cohort study) or whether sedentary lifestyles are more common among MI cases than other people who have not had an MI (a case-control study).

The case-crossover method is an epidemiological design for studying potential causes of sudden events,[1] such as whether vigorous exertion or drinking alcohol triggers a myocardial infarction (MI).[2] Case-crossover studies are one of a family of 'self-controlled' study designs,[3] including cross-over experiments and the self-controlled case series[4] (Box 2). Each subject serves as their own control, and the analysis tests whether exposure times are associated with outcome times within individuals. In contrast, standard observational studies make comparisons between individuals, such as differences in MI rates between alcohol drinkers and non-drinkers (a cohort study) or whether sedentary lifestyles are more common among MI cases than people who have not previously had an MI (a case-control study).

A case-crossover study only includes individuals who experience an event ('cases'). Figure 1 is an illustrative study looking at the association between vigorous exertion and MI. In the case-crossover approach, non-cases are excluded. ~~The~~ In this example, the probability of exertion shortly in the time window before MI is compared to the probability in that window 24hr before earlier in the same individuals. If someone had an MI at 6pm on Friday and we are interested in the risk up to one hour after physical exertion, we would take their history of exertion between 5pm and 6pm on that day, and compare it to their physical exertion between 5pm and 6pm on Thursday. If the participant died this information may be ascertained by interviewing family members or other informants. In contrast to the case-crossover approach, a case-control study might match cases who had an MI with controls who had not had an MI by that point in time, and compare the probability of recent exercise.

Figure 1: Illustrative case-crossover study of the association between vigorous exertion and myocardial infarction

Figure 1 caption: The relation between case-crossover and case-control designs is illustrated with timelines for six individuals (A to F) in a case-control study (left). A, B, and C had myocardial infarctions (encircled X). D, E, and F were controls selected at the same times (open green circles). The exposure of interest was vigorous exertion (rectangles). A case-crossover design (right) compares the probability of exertion in the hour before MI to the same time the previous day in the same individual. Non-cases (D, E, and F) do not contribute to the case-crossover analysis.

| Box 2: Comparison of features of the case-crossover and self-controlled case series designs |                                   |                                 |
|---------------------------------------------------------------------------------------------|-----------------------------------|---------------------------------|
|                                                                                             | Case-crossover                    | Self-controlled case series     |
| <b>Analogous to</b>                                                                         | Case-control study                | Cohort study                    |
| <b>Developed to study</b>                                                                   | Multiple causes of an outcome     | Multiple effects of an exposure |
| <b>Example</b>                                                                              | Triggers of myocardial infarction | Adverse effects of vaccines     |

|                                   |                                                               |                                                                                                                |
|-----------------------------------|---------------------------------------------------------------|----------------------------------------------------------------------------------------------------------------|
| <b>Anchor point (time zero)</b>   | Onset of the outcome                                          | Exposure time, birth, or calendar date                                                                         |
| <b>Timing of referent windows</b> | Usually before the outcome                                    | Before and after the <b>exposure period</b><br><b>outcome</b>                                                  |
| <b>Potential bias</b>             | Exposure trend or persistence                                 | Reverse causality                                                                                              |
| <b>Comparisons</b>                | Ratios of odds of exposure                                    | Ratios <b>or differences</b> in <b>risk of</b> outcomes                                                        |
| <b>Statistical model</b>          | Conditional logistic <b>or conditional Poisson</b> regression | <b>Conditional logistic or conditional Poisson conditioned on</b> regression, offset by person <b>and</b> time |
| <b>Model assumes</b>              | <b>Outcome fixed, random exposure</b>                         | <b>Exposure fixed, random outcome</b>                                                                          |

### Example applications

The case-crossover design was developed for an interview study of triggers of MI such as exertion, alcohol, anger, and cannabis.[4][1] It has since been used with databases in many contexts,[8] and here we give four brief examples.

(i) Air pollution and cardiovascular events. Case-crossover studies have found elevated concentrations of pollutants on the day of a stroke or heart attack compared to the concentration on earlier or later days.[5] ~~These studies are often statistically powerful because researchers can include large numbers of cases and determine pollution from routine weather records.~~ (ii) Car crashes and mobile phone use. Case-crossover studies have found that drivers have several times the odds of using a mobile phone in the minutes before the crash when compared to similar a time-of-day earlier in the week.[6,7] (iii) Adverse medication effects. A study of falls among hospital inpatients found that new prescriptions of various drugs such as antihypertensives and hypnotics were more common in the three days before the fall than during earlier referent windows.[8] (iv) Triggers of drug overdoses. A study of deaths in England found that decedents were four times more likely to have been recently discharged after inpatient medical treatment compared with the two years before death.[9][5] ~~These studies are often statistically powerful because researchers can include large numbers of cases and determine pollution from routine weather records.~~ (ii) Car crashes and mobile phone use. Case-crossover studies have found that drivers have several times the odds of using a mobile phone in the minutes before the crash when compared to similar a time-of-day earlier in the week.[6,7] (iii) Adverse medication effects. A study of falls among hospital inpatients found that new prescriptions of drugs such as antihypertensives and hypnotics were more common in the three days before the fall than during earlier referent windows.[8] (iv) Triggers of drug overdoses. A study of deaths in England found that decedents were four times more likely to have been recently discharged after inpatient medical treatment compared with the two years before death.[9] Common features of these research questions include the focus on sudden events and the 'triggering' effect of transient exposures.

### Selection of control (or 'referent') windows

~~The choice of referent windows is a key design decision. It is dependent on the definition of 'at-risk' time, or the 'study base'. [2] In the study of car crashes in Australia, [7] the researchers compared mobile phone use at the time of the crash to earlier car trips at similar times-of-day; not just the same time on previous days when the participant might not have been driving.~~

~~Researchers must consider the duration of effect, or 'effect period' [3]: the period after exposure when we hypothesise that the event might be triggered. This may not be known precisely and may vary between individuals. When attempting to set referent windows that match effect periods, researchers often need to make informed judgements and simplifying~~

assumptions. Referent windows that are too short will reduce power by excluding relevant events, while windows that are too long will dilute the estimated effect.

The duration and timing of referent windows is a key design decision. It is dependent on the definition of 'at-risk' time, or the 'study base'.<sup>[2]</sup> In a study of car crashes in Australia,<sup>[7]</sup> the researchers compared mobile phone use at the time of the crash to earlier car trips at similar times-of-day; not just the same time on previous days when the participant might not have been driving.

Researchers must consider the duration of effect, or 'effect period'<sup>[3]</sup>: the plausible duration of induction times between the trigger (e.g. physical exertion) and its outcome (e.g. MI). This may not be known precisely and may vary between individuals. When attempting to set referent windows that match effect periods, researchers often need to make informed judgements based on previous research and simplifying assumptions. These decisions are likely to affect the results. Referent windows that are too short will reduce power by excluding events, while windows that are too long are likely to bias results towards the null.

The time between the event and referent window is also important. The referent windows should be sufficiently distant from the event so that exposure is not affected by the event. Simultaneously, referent windows should be sufficiently recent that the underlying rate of exposure is comparable, or 'exchangeable'.<sup>[4][10]</sup> In a study of mobile phone use and car crashes, the probability of mobile phone use during a referent window five minutes before the crash would be correlated with mobile phone use at the time of the crash because some phone calls are longer than this. A control window one year before the crash might be inappropriate if it was during a COVID-19 lockdown.

Referent windows can be before the event, after the event, or both. In the example in Figure 1, MI is likely to reduce vigorous exercise, at least temporarily, so we would only select historical referent windows. Referent windows after a non-fatal MI would overstate the risks of exercise ('reverse causality bias' in Box 2). If the event does not affect subsequent exposure, such as in studies of air pollution, then referent windows both before and after the event reduces the risk of bias due to time trends in the exposure.

### Strengths and limitations

In common with other self-controlled designs, a strength of the case-crossover design is that it eliminates time-invariant confounders, even when unmeasured. This includes personality traits, genetics, country of birth, and many other constant characteristics of patients not recorded in medical charts. For example, in Figure 1, the underlying severity of atherosclerosis is constant over the two days of observation.

Another reason for using the case-crossover design is ~~if that~~ suitable controls ~~are can be~~ difficult to find in case-control studies. ~~For example, in~~ the study of hospital discharges and opioid overdoses,<sup>[9][9]</sup> a traditional case-control study would be challenging because it would need to recruit a representative sample of controls who were at-risk of opioid overdose at the time the cases died.

Case-crossover designs are often statistically powerful (i.e. they produce precise estimates) because they allow sampling of a large proportion of cases. Traditional cohort or case-control studies may include more person-time, but capture fewer events and yield less precise estimates. Power calculations for case-crossover studies must account for the within-individual comparisons and the likelihood of correlated exposures. This may be done through simulation or formulas designed to account for these factors.<sup>[11]</sup>

Three key limitations of the case-crossover design are time-varying confounding, the limitation to the short-term effects of transient exposures, and selection biases.

Co-occurring acute exposures are especially challenging in case-crossover design. For example, if we want to study the effect of cannabis use on injury, the association might be confounded by co-occurring alcohol consumption (Figure 2). As in any observational study, the causal relationship between exposures and potential confounders must be interpreted by the researcher based on existing evidence and common sense. Where time-varying confounders are measured, they can be controlled in multivariable analysis as in traditional epidemiological studies.

*Figure 2: Example of time-varying confounding in a case-crossover study of injuries: co-occurrence of cannabis and alcohol consumption would result in the association between cannabis use and injury being confounded by alcohol use.*

Case-crossover [studies](#) only capture the short-term effects of transient exposures, such as an adverse event soon after starting a medication. However, cumulative harms or benefits from long-term medication would not be picked up by a case-crossover study. Transient effects can be in the opposite direction of cumulative effects: while a single run increases your immediate risk of MI, regular running reduces your risk. Transient and cumulative effects can be disentangled by combining a case-crossover design with a case-control study as in Figure 1. This also helps understand different forms of bias and contribute to ‘triangulation’ of causal associations.[\[11,12\]](#)

Case-crossover studies use information from cases only if their exposure status varies over time. These individuals may be unrepresentative of the whole population. In [the](#) example in Figure 1, people who exercise at the same time each day, potentially an important part of the population, are excluded because their exposure status will be the same at the time of the MI and 24 hours earlier. Multiple referent windows may increase the number of cases who have varying exposure status.

## Conclusion

The case-crossover design is a widely used tool for studying triggers of sudden health events. [As databases following individuals over time increase](#)[The fundamental points of the design have not changed since it was developed in number](#)[the 1990s, and richness, many new](#)[the original articles describing it remain a good starting point for researchers.](#)[\[1,2\]](#) New opportunities to [apply the method](#) are arising with the availability of databases with time-stamped exposures, such as precise locations, mobile phone use [this design will be found, and retail purchases.](#)[\[12\]\[13,14\]](#)

## Competing interests

Competing interests: We have read and understood the BMJ policy on declaration of interest and declare the following interests: none.

## References

- 1—Maclure M. The Case-Crossover Design: A Method for Studying Transient Effects on the Risk of Acute Events. *Am J Epidemiol* 1991;133:144–53. doi:10.1093/oxfordjournals.aje.a115853
- 2—Maclure M, Mittleman MA. Should We Use a Case-Crossover Design? *Annu Rev Public Health* 2000;21:193–221. doi:10.1146/annurev.publhealth.21.1.193
- 3—Cadarette SM, Maclure M, Delaney JAC, et al. Control yourself: ISPE-ENDORSED guidance in the application of SELF-CONTROLLED study designs in pharmacoepidemiology. *Pharmacoepidemiol Drug Saf* 2021;30:671–84. doi:10.1002/pds.5227
- 4—Petersen I, Douglas I, Whitaker H. Self controlled case series methods: an alternative to standard epidemiological study designs. *BMJ* 2016;:i4515. doi:10.1136/bmj.i4515
- 5—Stieb DM, Zheng C, Salama D, et al. Systematic review and meta-analysis of case-crossover and time-series studies of short term outdoor nitrogen dioxide exposure and ischemic heart disease morbidity. *Environ Health* 2020;19:47. doi:10.1186/s12940-020-00601-1



- 6— [Redelmeier DA, Tibshirani RJ. Association between Cellular-Telephone Calls and Motor Vehicle Collisions. \*N Engl J Med\* 1997;\*\*336\*\*:453–8. doi:10.1056/NEJM199702133360704](#)
- 7— [McEvoy SP, Stevenson MR, McCartt AT, et al. Role of mobile phones in motor vehicle crashes resulting in hospital attendance: a case-crossover study. \*BMJ\* 2005;\*\*331\*\*:428. doi:10.1136/bmj.38537.397512.55](#)
- 8— [Shuto H, Imakyure O, Matsumoto J, et al. Medication use as a risk factor for inpatient falls in an acute care hospital: a case-crossover study: Case-crossover study on medication use and fall events. \*Br J Clin Pharmacol\* 2010;\*\*69\*\*:535–42. doi:10.1111/j.1365-2125.2010.03613.x](#)
- 9— [Lewer D, Eastwood B, White M, et al. Fatal opioid overdoses during and shortly after hospital admissions in England: A case-crossover study. \*PLOS Med\* 2021;\*\*18\*\*:e1003759. doi:10.1371/journal.pmed.1003759](#)
- 10— [Mittleman MA, Mostofsky E. Exchangeability in the case-crossover design. \*Int J Epidemiol\* 2014;\*\*43\*\*:1645–55. doi:10.1093/ije/dyu081](#)
- 11— [Lawlor DA, Tilling K, Davey Smith G. Triangulation in aetiological epidemiology. \*Int J Epidemiol\* 2017;:dyw314. doi:10.1093/ije/dyw314](#)
- 12— [Dixon WG, Beukenhorst AL, Yimer BB, et al. How the weather affects the pain of citizen scientists using a smartphone app. \*Npj Digit Med\* 2019;\*\*2\*\*:105. doi:10.1038/s41746-019-0180-3](#)
- 1— [Maclure M. The Case-Crossover Design: A Method for Studying Transient Effects on the Risk of Acute Events. \*American Journal of Epidemiology\* 1991;\*\*133\*\*:144–53. doi:10.1093/oxfordjournals.aje.a115853](#)
- 2— [Maclure M, Mittleman MA. Should We Use a Case-Crossover Design? \*Annual Review of Public Health\* 2000;\*\*21\*\*:193–221. doi:10.1146/annurev.publhealth.21.1.193](#)
- 3— [Cadarette SM, Maclure M, Delaney JAC, et al. Control yourself: ISPE-ENDORSED guidance in the application of SELF-CONTROLLED study designs in pharmacoepidemiology. \*Pharmacoepidemiol Drug Saf\* 2021;\*\*30\*\*:671–84. doi:10.1002/pds.5227](#)
- 4— [Petersen I, Douglas I, Whitaker H. Self controlled case series methods: an alternative to standard epidemiological study designs. \*BMJ\* 2016;:i4515. doi:10.1136/bmj.i4515](#)
- 5— [Stieb DM, Zheng C, Salama D, et al. Systematic review and meta-analysis of case-crossover and time-series studies of short term outdoor nitrogen dioxide exposure and ischemic heart disease morbidity. \*Environ Health\* 2020;\*\*19\*\*:47. doi:10.1186/s12940-020-00601-1](#)
- 6— [Redelmeier DA, Tibshirani RJ. Association between Cellular-Telephone Calls and Motor Vehicle Collisions. \*N Engl J Med\* 1997;\*\*336\*\*:453–8. doi:10.1056/NEJM199702133360704](#)
- 7— [McEvoy SP, Stevenson MR, McCartt AT, et al. Role of mobile phones in motor vehicle crashes resulting in hospital attendance: a case-crossover study. \*BMJ\* 2005;\*\*331\*\*:428. doi:10.1136/bmj.38537.397512.55](#)
- 8— [Shuto H, Imakyure O, Matsumoto J, et al. Medication use as a risk factor for inpatient falls in an acute care hospital: a case-crossover study: Case-crossover study on medication use and fall events. \*British Journal of Clinical Pharmacology\* 2010;\*\*69\*\*:535–42. doi:10.1111/j.1365-2125.2010.03613.x](#)
- 9— [Lewer D, Eastwood B, White M, et al. Fatal opioid overdoses during and shortly after hospital admissions in England: A case-crossover study. \*PLoS Med\* 2021;\*\*18\*\*:e1003759. doi:10.1371/journal.pmed.1003759](#)
- 10— [Mittleman MA, Mostofsky E. Exchangeability in the case-crossover design. \*International Journal of Epidemiology\* 2014;\*\*43\*\*:1645–55. doi:10.1093/ije/dyu081](#)
- 11— [Dharmarajan S, Lee J, Izem R. Sample size estimation for case-crossover studies. \*Statistics in Medicine\* 2019;\*\*38\*\*:956–68. doi:10.1002/sim.8030](#)
- 12— [Lawlor DA, Tilling K, Davey Smith G. Triangulation in aetiological epidemiology. \*Int J Epidemiol\* 2017;:dyw314. doi:10.1093/ije/dyw314](#)
- 13— [Dixon WG, Beukenhorst AL, Yimer BB, et al. How the weather affects the pain of citizen scientists using a smartphone app. \*npj Digit Med\* 2019;\*\*2\*\*:105. doi:10.1038/s41746-019-0180-3](#)
- 14— [Eum Y, Yoo E-H. Using GPS-enabled mobile phones to evaluate the associations between human mobility changes and the onset of influenza illness. \*Spatial and Spatio-temporal Epidemiology\* 2022;\*\*40\*\*:100458. doi:10.1016/j.sste.2021.100458](#)
